# Supplementary material
Source: PubMed Central journal article supplement (PMC6129127)
Supplement: jciinsight-3-122737-s178.pdf [file jciinsight-3-122737-s178.pdf]

| Bile Acid                                | Abbreviations        | $m/z \pm 0.01$ Da | RT $\pm$ 0.2 min | Internal Standard used for Quantification |
|------------------------------------------|----------------------|-------------------|------------------|-------------------------------------------|
| Lithocholic acid                         | LCA                  | 375.2894          | 10.51            | LCA-d <sub>5</sub>                        |
| Lithocholic acid-d <sub>5</sub>          | LCA-d <sub>5</sub>   | 380.3202          | 10.5             | N/A                                       |
| Deoxycholic acid                         | DCA                  | 391.2857          | 9.22             | DCA-D <sub>6</sub>                        |
| Ursodeoxycholic acid                     | UDCA                 | 391.2857          | 8.27             | DCA-D <sub>6</sub>                        |
| Chenodeoxycholic acid                    | CDCA                 | 391.2857          | 9.08             | CDCA-d <sub>4</sub>                       |
| Chenodeoxycholic acid-d <sub>4</sub>     | CDCA-d <sub>4</sub>  | 395.3089          | 9.08             | N/A                                       |
| Deoxycholic acid-d <sub>6</sub>          | DCA-D <sub>6</sub>   | 397.3213          | 9.19             | N/A                                       |
| Cholic acid                              | CA                   | 407.2804          | 8.03             | CA-d <sub>5</sub>                         |
| Muricholic acid alpha                    | MCA alpha            | 407.2804          | 7.49             | CA-d <sub>5</sub>                         |
| Muricholic acid beta                     | MCA beta             | 407.2804          | 7.66             | CA-d <sub>5</sub>                         |
| Muricholic acid gamma                    | MCA gamma            | 407.2804          | 7.84             | CA-d <sub>5</sub>                         |
| Cholic acid-d <sub>5</sub>               | CA-d <sub>5</sub>    | 412.31            | 8.02             | N/A                                       |
| Glycochenodeoxycholic acid               | GCDCA                | 448.3062          | 8.2              | CDCA-d <sub>4</sub>                       |
| Glycodeoxycholic acid                    | GDCA                 | 448.3062          | 8.35             | DCA-D <sub>6</sub>                        |
| Glycoursodeoxycholic acid                | GUDCA                | 448.3062          | 7.44             | CDCA-d <sub>4</sub>                       |
| Glycocholic acid                         | GCA                  | 464.3014          | 7.34             | CA-d <sub>5</sub>                         |
| Taurolithocholic acid                    | TLCA                 | 482.2935          | 9.48             | TLCA-d <sub>4</sub>                       |
| Taurolithocholic acid-d <sub>4</sub>     | TLCA-d <sub>4</sub>  | 486.3181          | 9.48             | N/A                                       |
| Taurochenodoxycholic acid                | TCDCA                | 498.2891          | 8.19             | TCDCA-d <sub>4</sub>                      |
| Taurodeoxycholic acid                    | TDCA                 | 498.2891          | 8.37             | TDCA-d <sub>4</sub>                       |
| Tauroursodeoxycholic acid                | TDCA                 | 498.2891          | 7.37             | TUDCA-d <sub>4</sub>                      |
| Taurochenodoxycholic acid-d <sub>4</sub> | TCDCA-d <sub>4</sub> | 502.313           | 8.19             | N/A                                       |
| Taurodoxycholic acid-d <sub>4</sub>      | TDCA-d <sub>4</sub>  | 502.313           | 8.37             | N/A                                       |
| Tauroursodeoxycholic acid-d <sub>4</sub> | TUDCA-d <sub>4</sub> | 502.313           | 7.36             | N/A                                       |
| Taurocholic acid                         | TCA                  | 514.2843          | 7.35             | TCA-d <sub>4</sub>                        |
| Tauromuricholic acid alpha               | TMCA alpha           | 514.2843          | 6.66             | TCA-d <sub>4</sub>                        |
| Tauromuricholic acid beta                | TMCA beta            | 514.2843          | 6.75             | TCA-d <sub>4</sub>                        |
| Tauromuricholic acid gamma               | TMCA gamma           | 514.2843          | 7.02             | TCA-d <sub>4</sub>                        |
| Taurocholic acid-d <sub>4</sub>          | TCA-d <sub>4</sub>   | 518.3079          | 7.35             | N/A                                       |

**Supplementary Table 1. LC-MS Bile Acid Analysis mass-to-charge ratios ( $m/z$ ), Retention Times (RTs), and Internal Standards used for Quantification. Abbreviation: N/A, not applicable.**
